# Supplementary material
Source: publisher site journal article supplement (http://kjim.org/upload/media/kjim-2020-559-suppl5.pdf)
Supplement: Supplementary file 1 [file kjim-2020-559-suppl5.pdf]

**Supplementary Table 5. Comparison of FVC and DL<sub>CO</sub> decline rate according to the dose of pirfenidone: 1,200–1,600 mg dose vs. < 1,200 mg dose**

| Parameter                                                                      | Time           | 1,200–1,600 mg dose (n = 53 <sup>a</sup> or 48 <sup>b</sup> ) |                 |         | < 1,200 mg dose (n = 29 <sup>a</sup> or 27 <sup>b</sup> ) |                 |         |
|--------------------------------------------------------------------------------|----------------|---------------------------------------------------------------|-----------------|---------|-----------------------------------------------------------|-----------------|---------|
|                                                                                |                | Mean                                                          | 95% CI          | p value | Mean                                                      | 95% CI          | p value |
| Δ FVC/year (%) <sup>c</sup> (n = 82)                                           | Pre-treatment  | -5.64                                                         | -7.99 to -3.29  |         | -3.95                                                     | -7.03 to -0.87  |         |
|                                                                                | Post-treatment | -0.43                                                         | -1.63 to 0.76   |         | -3.86                                                     | -5.36 to -2.37  |         |
|                                                                                | Difference     | 5.21                                                          |                 | < 0.001 | 0.09                                                      |                 | 0.931   |
| p value for homogeneity of difference in parameter between two groups: < 0.001 |                |                                                               |                 |         |                                                           |                 |         |
| Δ DL <sub>CO</sub> /year (%) <sup>c</sup> (n = 75)                             | Pre-treatment  | -6.80                                                         | -10.77 to -2.83 |         | -9.23                                                     | -13.64 to -4.82 |         |
|                                                                                | Post-treatment | -2.02                                                         | -3.47 to -0.56  |         | -4.86                                                     | -6.95 to -2.77  |         |
|                                                                                | Difference     | 4.78                                                          |                 | < 0.001 | 4.37                                                      |                 | 0.001   |
| p value for homogeneity of difference in parameters between two groups: 0.798  |                |                                                               |                 |         |                                                           |                 |         |

FVC, forced vital capacity; DL<sub>CO</sub>, diffusing capacity of the lungs for carbon monoxide; CI, confidence interval.

<sup>a</sup>Δ FVC/year.

<sup>b</sup>Δ DL<sub>CO</sub>/year.

<sup>c</sup>Change in % predicted per year.
